# Supplementary material
Source: Springer Nature journal article supplement (https://www.springermedizin.de/resource/supplementary/12885_2006_761_MOESM6_ESM.pdf/9470254)

**Figure 4E**

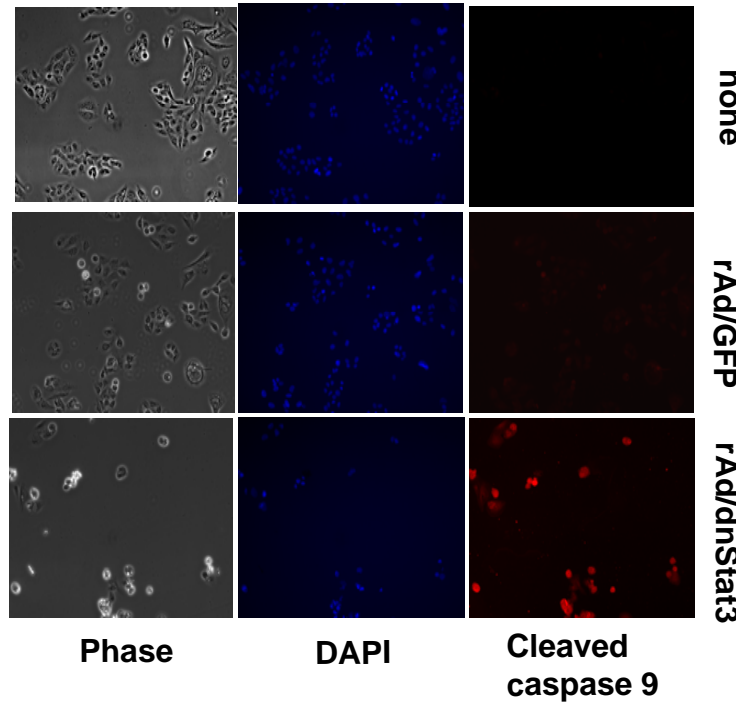

**Figure 4F**

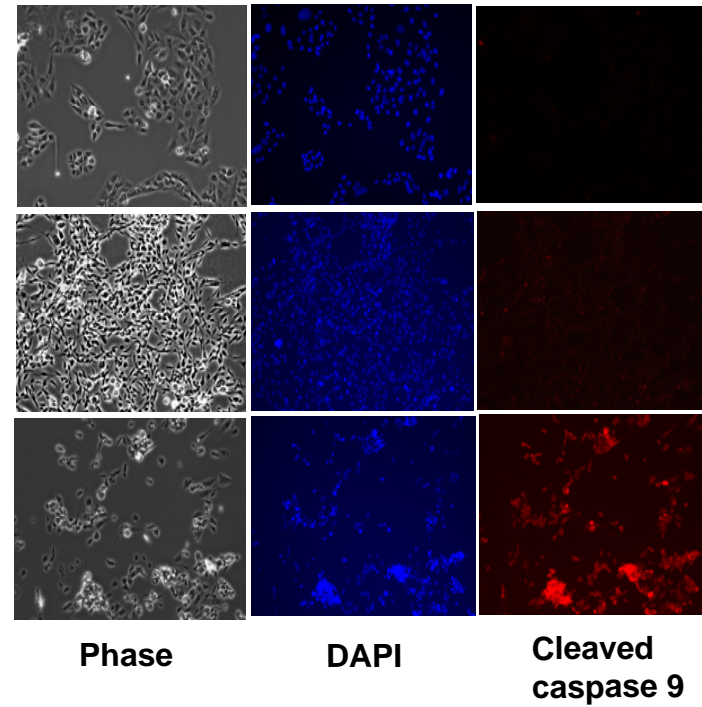

Supplement: MOESM6 [file 9470254]
